# Supplementary material for: Plasma Proteomic Patterns Show Sex Differences in Early Concentric Left Ventricular Remodeling
Source: PubMed Central journal article supplement (PMC10348648; doi:10.1161/circheartfailure.122.010255), 2023-06-29
Supplement: hhf-16-e010255-s001.pdf [file hhf-16-e010255-s001.pdf]

## **SUPPLEMENTAL MATERIAL**

**Table S1: Percentage of missing values in the total data set and the proteomics subset**

**Table S2: Unadjusted Cox regression models for the association between of concentric remodeling, eccentric and concentric LVH and HF, HFpEF and mortality**

**Table S3: Cox regression analyses of concentric remodeling, eccentric and concentric LVH with HFrEF.**

**Table S4: Logistic Regression analyses for the association between blood pressure and cRM.**

**Table S5: Baseline characteristics of the proteomics subsample (n= 829) stratified by sex and ventricular geometry class.**

**Table S6: Sex-stratified linear regression analysis of risk factors with RWT (%) in the proteomics subsample (n= 770).**

**Table S7: Baseline characteristics of individuals in the subsample that were included in the proteomics analysis and risk factor analyses**

**Figure S1: Central Illustration**

**Figure S2: Flowchart for analyses using data from the Cardiology Centers of the Netherlands Outpatient clinics population.**

**Figure S3: Flowchart for sample selection and quality control in the proteomics subsample**

**Figure S4: Volcano plots representing proteins negatively and positively associated with relative wall thickness.**

**Figure S5: Figure S5: The association of Interferon  $\alpha$  5 with higher RWT in women (red) and men (blue).**

**Figure S6: Pathway analysis of proteins related to relative wall thickness in women and men separately.**

**Table S1: Percentage of missing values in the total data set and the proteomics subset**

|                                                 | Percentage missingness |             |
|-------------------------------------------------|------------------------|-------------|
|                                                 | Proteomics subset      | CCN dataset |
|                                                 | (n= 829)               | (n= 60,593) |
| Sex                                             | 0                      | 0           |
| Age (years)                                     | 0                      | 0           |
| BMI (kg/m <sup>2</sup> )                        | 0                      | 0           |
| Waist to hip ratio                              | 2.8                    | NA          |
| Heart rate (bpm)                                | 5.2                    | 0.5         |
| Systolic blood pressure (mmHg)                  | 0.8                    | 1.5         |
| Diastolic blood pressure (mmHg)                 | 0.8                    | 1.4         |
| Maximal workload during exercise testing (Watt) | 16.4                   | 24.1        |
| Double product at rest                          | 5.4                    | 2.1         |
| Double product at peak exercise                 | 17                     | 24.6        |
| Delta in double product (peak exercise-rest)    | 20.9                   | 25.9        |
| Diabetes Mellitus                               | 0                      | 0.9         |
| Hypertension                                    | 0                      | 0.8         |
| Hyperlipidemia                                  | 0                      | 0.8         |
| Smoking                                         | 1                      | 6.8         |
| Alcohol consumption                             | 30.2                   | 9.5         |
| <i>Medication</i>                               |                        |             |
| β Blocker                                       | 0                      | 0           |
| Antihypertensive medication                     | 0                      | 0           |
| Statin                                          | 0                      | 0           |

*Laboratory*

|                                  |      |      |
|----------------------------------|------|------|
| Total cholesterol (mmol/L)       | 10.1 | 31.4 |
| CRP (mg/L)                       | 27.1 | NA   |
| Creatinine ( $\mu\text{mol/L}$ ) | 10.4 | 30.8 |
| Average amount of missing data   | 6.7% | 8.1% |

---

Abbreviations: BMI, Body Mass Index; CRP, C-reactive protein; NA, not available.

**Table S2: Unadjusted Cox regression models for the association between of concentric remodeling, eccentric and concentric LVH and HF, HFpEF and mortality**

|                        | Men+ Women         |                         | Women             | Men                |
|------------------------|--------------------|-------------------------|-------------------|--------------------|
|                        | HR (95% CI)        | p-value sex-interaction | HR (95% CI)       | HR (95% CI)        |
| <b>HF</b>              |                    |                         |                   |                    |
| normal geometry        | 1                  | 0.012                   | 1                 | 1                  |
| concentric remodelling | 1.39 (1.00, 1.94)  |                         | 1.72 (1.23, 2.40) | 1.39 (0.99, 1.94)  |
| eccentric LVH          | 4.72 (3.26, 6.85)  |                         | 2.51 (1.65, 3.80) | 4.72 (3.25, 6.86)  |
| concentric LVH         | 6.83 (4.77, 9.79)  |                         | 4.16 (2.87, 6.04) | 6.85 (4.78, 9.83)  |
| <b>HFpEF</b>           |                    |                         |                   |                    |
| normal geometry        | 1                  | 0.031                   | 1                 | 1                  |
| concentric remodelling | 2.00 (1.34, 2.98)  |                         | 1.98 (1.38, 2.83) | 1.99 (1.33, 2.97)  |
| eccentric LVH          | 3.23 (1.81, 5.75)  |                         | 1.46 (0.82, 2.59) | 3.24 (1.82, 5.79)  |
| concentric LVH         | 8.47 (5.39, 13.29) |                         | 4.05 (2.66, 6.17) | 8.50 (5.40, 13.37) |
| <b>Mortality</b>       |                    |                         |                   |                    |
| normal geometry        | 1                  | <0.001                  | 1                 | 1                  |
| concentric remodelling | 1.47 (1.34, 1.62)  |                         | 1.80 (1.61, 2.00) | 1.47 (1.34, 1.62)  |
| eccentric LVH          | 3.44 (3.01, 3.93)  |                         | 3.30 (2.87, 3.79) | 3.44 (3.01, 3.93)  |
| concentric LVH         | 2.76 (2.37, 3.21)  |                         | 4.69 (4.13, 5.33) | 2.77 (2.38, 3.22)  |

Abbreviations: HF; heart failure, HFpEF; heart failure with preserved ejection fraction, LVH; left ventricular hypertrophy; HR, hazard ratio; CI, confidence interval

**Table S3: Cox regression analyses of concentric remodeling, eccentric and concentric LVH with HFrEF.**

|       |                        | Men+ Women         |                             | Women              | Men                |
|-------|------------------------|--------------------|-----------------------------|--------------------|--------------------|
|       |                        |                    | p-value sex-<br>interaction |                    |                    |
| HFrEF | Crude model            | HR (95% CI)        |                             | HR (95% CI)        | HR (95% CI)        |
|       | normal geometry        | 1                  | 0.99                        | 1                  | 1                  |
|       | concentric remodelling | 0.62 (0.32, 1.22)  |                             | 0.64 (0.21, 1.97)  | 0.62 (0.32, 1.22)  |
|       | eccentric LVH          | 6.77 (4.10, 11.19) |                             | 7.11 (3.52, 14.36) | 6.75 (4.08, 11.19) |
|       | concentric LVH         | 5.14 (2.79, 9.49)  |                             | 4.87 (2.12, 11.20) | 5.16 (2.79, 9.54)  |
|       |                        |                    | p-value sex-<br>interaction |                    |                    |
| HFrEF | Adjusted model         | HR (95% CI)        |                             | HR (95% CI)        | HR (95% CI)        |
|       | normal geometry        | 1                  | 0.79                        | 1                  | 1                  |
|       | concentric remodelling | 0.58 (0.30, 1.14)  |                             | 0.53 (0.17, 1.66)  | 0.57 (0.29, 1.13)  |
|       | eccentric LVH          | 5.62 (3.37, 9.36)  |                             | 6.03 (2.88, 12.62) | 5.51 (3.29, 9.25)  |
|       | concentric LVH         | 4.63 (2.48, 8.63)  |                             | 3.57 (1.47, 8.69)  | 4.56 (2.43, 8.58)  |

Abbreviations: HFrEF, heart failure with reduced ejection fraction; LVH, left ventricular hypertrophy; HR, hazard ratio; CI, confidence interval.

Corrected for: age, systolic blood pressure, body mass index, diabetes, smoking status and kidney function

**Table S4: Logistic Regression analyses for the association between blood pressure and cRM.**

|               | Women<br>(n= 29,255) | Men<br>(n= 25,446) | p-value sex-interaction |
|---------------|----------------------|--------------------|-------------------------|
|               | OR (95% CI)          | OR (95% CI)        |                         |
| Hypertension* | 1.06 (1.05, 1.08)    | 1.05 (1.04, 1.07)  | 0.29                    |
| SBP†          | 1.02 (1.02, 1.03)    | 1.04 (1.03, 1.04)  | <0.001                  |
| DBP†          | 1.03 (1.02, 1.03)    | 1.05 (1.04, 1.05)  | <0.001                  |

Abbreviations: SBP, systolic blood pressure; DBP, diastolic blood pressure; OR, odds ratio; CI, confidence interval. SBP and DBP are modelled per standard deviation increase. \* Corrected for age, SBP and body mass index. † Corrected for age, heart rate, cholesterol, body mass index, smoking, hypertension medication

**Table S5: Baseline characteristics of the proteomics subsample (n= 829) stratified by sex and ventricular geometry class.**

|                                 | normal geometry n= 399<br>(48.1%) |                 |             | concentric remodelling n=<br>371 (44.7%) |                 |             | eccentric LVH n= 23 (2.8%) |                 |             | concentric LVH n= 36 (4.3%) |              |             |
|---------------------------------|-----------------------------------|-----------------|-------------|------------------------------------------|-----------------|-------------|----------------------------|-----------------|-------------|-----------------------------|--------------|-------------|
|                                 | men                               | women           | p-<br>value | men                                      | women           | p-<br>value | men                        | women           | p-<br>value | men                         | women        | p-<br>value |
| n (%) by sex                    | 126 (48.3)                        | 273 (48.1)      |             | 116 (44.4)                               | 255 (44.9)      |             | 7 (2.7)                    | 16 (2.8)        |             | 12 (4.6)                    | 24 (4.2)     |             |
| Age (years)                     | 62 (10)                           | 61 (9)          | 0.57        | 63 (10)                                  | 64 (8)          | 0.67        | 70 (6)                     | 65 (11)         | 0.31        | 67 (11)                     | 69 (10)      | 0.61        |
| BMI (kg/m <sup>2</sup> )        | 27.0 (3.4)                        | 26.8 (4.6)      | 0.81        | 27.3 (3.7)                               | 27.1<br>(4.7)   | 0.62        | 25.9 (3.7)                 | 27.7 (4.0)      | 0.34        | 27.5 (2.4)                  | 28.5 (5.5)   | 0.58        |
| Waist to hip ratio              | 0.96<br>(0.07)                    | 0.89<br>(0.07)  | <0.001      | 0.97 (0.07)                              | 0.89<br>(0.07)  | <0.001      | 0.98 (0.07)                | 0.91<br>(0.07)  | 0.039       | 0.96 (0.06)                 | 0.96 (0.10)  | 0.93        |
| Heart rate (bpm)                | 70 (12)                           | 71 (11)         | 0.55        | 73 (13)                                  | 74 (11)         | 0.55        | 66 (14)                    | 70 (13)         | 0.49        | 71 (17)                     | 69 (14)      | 0.73        |
| Systolic blood pressure (mmHg)  | 148 (18)                          | 142 (19)        | 0.002       | 150 (20)                                 | 147 (20)        | 0.30        | 156 (16)                   | 141 (17)        | 0.08        | 157 (25)                    | 163 (21)     | 0.45        |
| Diastolic blood pressure (mmHg) | 88 (10)                           | 84 (10)         | <0.001      | 90 (11)                                  | 87 (11)         | 0.008       | 86 (10)                    | 85 (11)         | 0.83        | 91 (12)                     | 90 (11)      | 0.79        |
| Peak workload exercise (W)      | 188 (45)                          | 128 (34)        | <0.001      | 179 (47)                                 | 122 (33)        | <0.001      | 170 (49)                   | 121 (51)        | 0.09        | 151 (68)                    | 114 (40)     | 0.12        |
| RPP at rest                     | 10352<br>(2156)                   | 10066<br>(2131) | 0.22        | 10916<br>(2486)                          | 10953<br>(2314) | 0.90        | 10300<br>(2164)            | 9902<br>(1998)  | 0.69        | 11258<br>(3782)             | 11253 (2892) | 0.99        |
| RPP at peak exercise            | 30632<br>(7015)                   | 26990<br>(6478) | <0.001      | 31479<br>(6571)                          | 26399<br>(6090) | <0.001      | 29320<br>(9102)            | 25176<br>(6947) | 0.32        | 26700<br>(8785)             | 26949 (9109) | 0.95        |
| Delta RPP (peak-rest)           | 20588<br>(7002)                   | 17124<br>(6291) | <0.001      | 20690<br>(6667)                          | 15684<br>(5761) | <0.001      | 15353<br>(1870)            | 15574<br>(7762) | 0.96        | 17193<br>(9471)             | 15320 (8815) | 0.66        |
| Diabetes Mellitus (n (%))       | 6 (4.8)                           | 14 (5.1)        | 1           | 14 (12.1)                                | 20 (7.8)        | 0.27        | 2 (28.6)                   | 2 (12.5)        | 0.56        | 1 (8.3)                     | 1 (4.2)      | 1           |
| Hypertension (n (%))            | 60 (47.6)                         | 131 (48.0)      | 1           | 75 (64.7)                                | 162<br>(63.5)   | 0.93        | 5 (71.4)                   | 10 (62.5)       | 1           | 8 (66.7)                    | 21 (87.5)    | 0.19        |
| Hyperlipidemia (n (%))          | 47 (37.3)                         | 100 (36.6)      | 0.99        | 41 (35.3)                                | 118<br>(46.3)   | 0.06        | 5 (71.4)                   | 7 (43.8)        | 0.37        | 5 (41.7)                    | 13 (54.2)    | 0.73        |
| Smoking (n (%))                 |                                   |                 | 0.45        |                                          |                 | 0.60        |                            |                 | 0.18        |                             |              | 0.06        |
| never                           | 49 (38.9)                         | 120 (44.3)      |             | 36 (32.1)                                | 95 (37.5)       |             | 1 (14.3)                   | 8 (50.0)        |             | 3 (25.0)                    | 15 (62.5)    |             |
| current                         | 13 (10.3)                         | 20 (7.4)        |             | 11 (9.8)                                 | 25 (9.9)        |             | 0 (0.0)                    | 0 (0.0)         |             | 4 (33.3)                    | 2 (8.3)      |             |
| former                          | 64 (50.8)                         | 131 (48.3)      |             | 65 (58.0)                                | 133<br>(52.6)   |             | 6 (85.7)                   | 8 (50.0)        |             | 5 (41.7)                    | 7 (29.2)     |             |
| Alcohol consumption (n (%))     |                                   |                 | 0.008       |                                          |                 | <0.001      |                            |                 | 0.76        |                             |              | 0.60        |
| never                           | 7 (7.4)                           | 39 (21.2)       |             | 4 (4.9)                                  | 36 (20.2)       |             | 2 (28.6)                   | 3 (30.0)        |             | 2 (22.2)                    | 4 (25.0)     |             |



|                                                 |                |                |        |                |                |        |                |                |        |                |                |        |
|-------------------------------------------------|----------------|----------------|--------|----------------|----------------|--------|----------------|----------------|--------|----------------|----------------|--------|
| ≤ 2 consumptions daily                          | 69 (73.4)      | 123 (66.8)     |        | 62 (76.5)      | 136 (76.4)     |        | 4 (57.1)       | 7 (70.0)       |        | 5 (55.6)       | 11 (68.8)      |        |
| ≥ 3 consumptions daily                          | 18 (19.1)      | 22 (12.0)      |        | 15 (18.5)      | 6 (3.4)        |        | 1 (14.3)       | 0 (0.0)        |        | 2 (22.2)       | 1 (6.2)        |        |
| <i>Echocardiography</i>                         |                |                |        |                |                |        |                |                |        |                |                |        |
| IVSD at end-diastole (mm)                       | 9.4 (1.3)      | 8.5 (1.2)      | <0.001 | 10.7 (1.5)     | 10.0 (1.3)     | <0.001 | 11.6 (2.0)     | 10.4 (1.0)     | 0.06   | 14.8 (2.9)     | 12.0 (1.5)     | <0.001 |
| LVD at end-diastole (mm)                        | 49 (5)         | 45 (4)         | <0.001 | 44 (5)         | 41 (4)         | <0.001 | 57 (5)         | 52 (5)         | 0.021  | 50 (4)         | 46 (4)         | 0.042  |
| LVPWD at end-diastole (mm)                      | 8.9 (1.1)      | 8.2 (0.9)      | <0.001 | 10.8 (1.2)     | 10.0 (1.0)     | <0.001 | 10.6 (0.5)     | 9.6 (0.7)      | 0.005  | 13.4 (1.5)     | 11.5 (0.8)     | <0.001 |
| Left ventricular ejection fraction (%)          | 68 (8)         | 68 (7)         | 0.72   | 66 (8)         | 67 (8)         | 0.11   | 65 (16)        | 66 (11)        | 0.86   | 67 (11)        | 67 (9)         | 0.90   |
| Average E/e' ratio                              | 8.4 (2.3)      | 9.2 (2.5)      | 0.002  | 8.6 (2.0)      | 9.7 (2.6)      | <0.001 | 9.0 (2.0)      | 11.2 (2.7)     | 0.061  | 13.0 (6.8)     | 11.5 (3.3)     | 0.36   |
| Left atrial volume index (ml/m <sup>2</sup> )   | 26 (9)         | 25 (8)         | 0.78   | 25 (9)         | 24 (9)         | 0.48   | 30 (12)        | 28 (12)        | 0.76   | 29 (9)         | 35 (26)        | 0.43   |
| Left ventricular mass index (g/m <sup>2</sup> ) | 76 (16)        | 67 (12)        | <0.001 | 80 (17)        | 72 (14)        | <0.001 | 132 (17)       | 104 (7)        | <0.001 | 137 (20)       | 109 (14)       | <0.001 |
| Relative wall thickness (%)                     | 36 (4)         | 36 (4)         | 0.56   | 50 (8)         | 49 (6)         | 0.45   | 37 (3)         | 37 (4)         | 0.87   | 55 (9)         | 50 (6)         | 0.06   |
| <i>Medication</i>                               |                |                |        |                |                |        |                |                |        |                |                |        |
| β Blocker (n (%))                               | 16 (12.7)      | 43 (15.8)      | 0.52   | 7 (6.0)        | 39 (15.3)      | 0.019  | 2 (28.6)       | 3 (18.8)       | 0.62   | 1 (8.3)        | 7 (29.2)       | 0.22   |
| Antihypertensive medication (n (%))             | 36 (28.6)      | 64 (23.4)      | 0.33   | 43 (37.1)      | 99 (38.8)      | 0.84   | 4 (57.1)       | 7 (43.8)       | 0.67   | 6 (50.0)       | 15 (62.5)      | 0.50   |
| Statin (n (%))                                  | 27 (21.4)      | 43 (15.8)      | 0.21   | 29 (25.0)      | 58 (22.7)      | 0.73   | 3 (42.9)       | 2 (12.5)       | 0.14   | 4 (33.3)       | 4 (16.7)       | 0.40   |
| <i>Laboratory</i>                               |                |                |        |                |                |        |                |                |        |                |                |        |
| Total cholesterol (mmol/L)                      | 5 (1)          | 5 (1)          | 0.71   | 5 (1)          | 5 (1)          | <0.001 | 5 (1)          | 6 (1)          | 0.45   | 5 (1)          | 5 (1)          | 0.91   |
| CRP (mg/L)                                      | 1.4 [0.7, 2.4] | 1.5 [0.7, 3.3] | 0.24   | 1.3 [0.7, 2.9] | 1.4 [0.7, 3.6] | 0.67   | 1.6 [1.2, 3.5] | 1.6 [1.3, 4.8] | 0.62   | 1.2 [1.0, 4.0] | 1.4 [0.9, 2.7] | 0.64   |
| Creatinine (μmol/L)                             | 81 (14)        | 64 (11)        | <0.001 | 78 (13)        | 65 (10)        | <0.001 | 93 (22)        | 63 (6)         | <0.001 | 77 (14)        | 67 (16)        | 0.07   |

Abbreviations: BMI, Body Mass Index; RPP, Rate-pressure product; IVSD, Interventricular septal diameter; LVD, Left ventricular internal dimension; LVPWD, left ventricular posterior wall diameter; CRP, C-reactive protein.

Antihypertensive medication are ACE-inhibitor, angiotensin II receptor blocker, thiazide diuretic, spironolactone and calcium channel blocker

The table represents 829 individuals that had no missing data on concentric remodeling.

P-values are calculated comparing women and men within each geometry class. Parametric and non-parametric tests are used for continuous variables based on normality of the distribution. For counts the Chi Square or Fisher exact test was used.

**Table S6: Sex-stratified linear regression analysis of risk factors with RWT (%) in the proteomics subsample (n= 770).**

|                                 | Women<br>(n= 528)        |                          | Men<br>(n= 242)      |                          | p-value sex<br>interaction<br>final model |
|---------------------------------|--------------------------|--------------------------|----------------------|--------------------------|-------------------------------------------|
|                                 | univariable              | multivariable            | univariable          | multivariable            |                                           |
|                                 | Beta (95% CI)            | Beta (95% CI)            | Beta (95% CI)        | Beta (95% CI)            |                                           |
| Age (years)                     | <b>1.17 (0.00, 2.33)</b> | -                        | 1.59 (-0.91, 2.27)   | -                        | 0.38                                      |
| BMI (kg/m <sup>2</sup> ) *      | 0.74 (-0.43, 1.91)       | 1.01 (-0.21, 2.23)       | 0.06 (-0.63, 0.75)   | -0.06 (-0.78, 0.65)      | 0.10                                      |
| WHR *                           | 1.28 (-0.06, 2.63)       | 1.21 (-0.17, 2.59)       | -0.33 (-0.75, 0.68)  | -0.46 (-1.17, 0.26)      | 0.026                                     |
| Creatinine (μmol/L) †           | 0.38 (-0.80, 1.57)       | 0.20 (-0.99, 1.39)       | 0.68 (-0.04, 1.41)   | 0.40 (-0.32, 1.12)       | 0.67                                      |
| Total cholesterol (mmol/L) ‡    | -1.04 (-2.21, 0.13)      | -0.84 (-2.14, 0.47)      | 0.31 (-0.40, 1.41)   | 0.26 (-0.48, 0.99)       | 0.13                                      |
| log(CRP) ‡                      | 0.83 (-0.58, 2.23)       | 0.58 (-0.85, 2.02)       | 0.24 (-0.55, 1.04)   | 0.16 (-0.71, 1.03)       | 0.60                                      |
| Resting heart rate (bpm) §      | 2.19 (0.96, 3.42)        | <b>1.93 (0.69, 3.17)</b> | 1.16 (0.47, 1.85)    | <b>0.93 (0.24, 1.63)</b> | 0.23                                      |
| Systolic blood pressure (mmHg)  | 1.32 (0.16, 2.49)        | 0.79 (-0.43, 2.02)       | 1.43 (0.75, 2.12)    | 0.71 (-0.02, 1.44)       | 0.87                                      |
| Diastolic blood pressure (mmHg) | 1.59 (0.43, 2.75)        | <b>1.25 (0.08, 2.41)</b> | 1.29 (0.61, 1.98)    | <b>0.97 (0.26, 1.67)</b> | 0.66                                      |
| Peak workload (W) #             | -0.70 (-1.96, -0.56)     | 0.15 (-1.37, 1.68)       | -1.06 (-1.78, -0.33) | -0.01 (-0.88, 0.85)      | 0.86                                      |
| Resting RPP (mmHg*bpm) #        | 2.51 (1.30, 3.71)        | 9.97 (-1.90, 21.85)      | 1.71 (1.03, 2.39)    | 3.42 (-3.53, 10.37)      | 0.37                                      |

|                                 |                     |                     |                     |                             |      |
|---------------------------------|---------------------|---------------------|---------------------|-----------------------------|------|
| Exercise RPP (mmHg*bpm) #       | 0.96 (-0.32, 2.24)  | 0.86 (-0.48, 2.20)  | 0.11 (-0.63, 0.86)  | -0.02 (-0.85, 0.81)         | 0.26 |
| Delta in RPP (mmHg*bpm) #       | 0.02 (-1.27, 1.30)  | 0.82 (-0.53, 2.18)  | -0.53(-1.28, 0.22)  | -0.03 (-0.83, 0.77)         | 0.27 |
| Alcohol consumption **          |                     |                     |                     |                             | 0.44 |
| ≤ 2 consumptions daily          | 1.02 (-5.15, 7.19)  | 0.49 (-5.88, 6.86)  | -0.05 (-1.93, 1.84) | -0.51 (-2.42, 1.40)         |      |
| ≥ 3 consumptions daily          | 1.06 (-5.70, 7.82)  | 0.41 (-6.64, 7.46)  | -2.56 (-5.81, 0.69) | <b>-3.44 (-6.71, -0.16)</b> |      |
| Smoking ††                      |                     |                     |                     |                             | 0.44 |
| former                          | -0.36 (-2.93, 2.22) | -1.00 (-3.72, 1.73) | 0.90 (-0.56, 2.36)  | 1.31 (-0.18, 2.80)          |      |
| current                         | -2.24 (-6.53, 2.05) | -2.48 (-6.84, 1.88) | -0.01 (-2.61, 2.59) | 0.76 (-1.82, 3.34)          |      |
| Diabetes Mellitus ††            | 3.08 (-1.17, 7.32)  | 2.82 (-1.47 7.12)   | 0.92 (-1.9, 3.73)   | -0.72 (-3.57, 2.13)         | 0.15 |
| Hypertension §§                 | 3.23 (0.90, 5.55)   | 2.30 (-0.21, 4.80)  | 3.16 (1.79, 4.52)   | <b>2.30 (0.77, 3.84)</b>    | 0.99 |
| β blocker                       | -3.89 (-7.86, 0.08) | -3.08 (-7.00, 0.84) | -0.74 (-2.65, 1.17) | -0.75 (-2.64, 1.13)         | 0.27 |
| Statin §§                       | 1.49 (-1.29, 4.26)  | 0.61 (-2.24, 3.47)  | 2.01(0.26, 3.76)    | 1.20 (-0.56, 2.95)          | 0.72 |
| Antihypertensive medications §§ | 1.62 (-0.87, 4.12)  | 0.70 (-1.87, 3.26)  | 3.67 (2.20, 5.13)   | <b>2.83 (1.32, 4.34)</b>    | 0.99 |

Abbreviations: RWT, relative wall thickness; BMI, Body Mass Index; CRP, C-reactive protein; bpm, beats per minute; RPP, Rate-pressure product; CI.

Confidence interval.

Antihypertensive medications are ACE-inhibitor, angiotensin II receptor blocker, thiazide diuretic, spironolactone and calcium channel blocker. Bold values represent significant findings from the final models. Analyses on RWT are conducted in 770 women and men without LVH. We reported beta coefficients for continuous variables per standard deviation increase. The outcome variable RWT (%) is modelled per point increase in RWT. This means that, for example, each SD increase in age in women results in a 1.17% increase in RWT.

\* BMI+WHR: corrected for age, SBP, alcohol and smoking, † creatinine: corrected for age, SBP, BMI, hypertension medication, smoking, ‡ CRP + cholesterol: corrected for age, SBP, BMI, statin use, § Heart rate: corrected for age, SBP, B-blocker use, || SBP + DBP: corrected for age, HR, cholesterol, BMI, smoking, hypertension medication, ¶ workload + resting rpp + exercise rpp + delta rpp: corrected for age, SBP, heart rate, BMI, \*\* alcohol consumption: corrected for age and smoking, †† smoking: corrected for age and alcohol consumption, ‡‡ Diabetes: corrected for age, BMI, SBP, hypertension medication, smoking, §§ Hypertension + hypertension medication + statin use: corrected for age, SBP and BMI, |||B-blocker use: corrected for age, SBP and heart rate

**Supplemental Table 7: Baseline characteristics of individuals in the subsample that were included in the proteomics analysis and risk factor analysis.**

| n                                               | Included in proteomics analysis and risk factor analysis<br>n= 557 | Included in risk factor analysis only<br>n= 272 | p-value |
|-------------------------------------------------|--------------------------------------------------------------------|-------------------------------------------------|---------|
| Women (n (%))                                   | 364 (65.4)                                                         | 204 (75.0)                                      | 0.006   |
| Age (years)                                     | 63 (9)                                                             | 63 (9)                                          | 0.61    |
| BMI (kg/m <sup>2</sup> )                        | 27.1 (4.5)                                                         | 27.1 (4.3)                                      | 0.94    |
| Waist to hip ratio                              | 0.91 (0.07)                                                        | 0.92 (0.08)                                     | 0.007   |
| Heart rate (bpm)                                | 72 (12)                                                            | 72 (12)                                         | 0.33    |
| Systolic blood pressure (mmHg)                  | 147 (20)                                                           | 145 (20)                                        | 0.08    |
| Diastolic blood pressure (mmHg)                 | 87 (10)                                                            | 86 (11)                                         | 0.28    |
| Maximal workload during exercise testing (Watt) | 141 (45)                                                           | 143 (49)                                        | 0.58    |
| Double product at rest                          | 10553 (2303)                                                       | 10533 (2368)                                    | 0.91    |
| Double product at peak exercise                 | 28236 (6554)                                                       | 27292 (7311)                                    | 0.10    |
| Delta in double product (peak exercise-rest)    | 17882 (6445)                                                       | 16955 (7068)                                    | 0.09    |
| Diabetes Mellitus (n (%))                       | 42 ( 7.5)                                                          | 18 ( 6.6)                                       | 0.74    |
| Hypertension (n (%))                            | 314 (56.4)                                                         | 158 (58.1)                                      | 0.69    |
| Hyperlipidemia (n (%))                          | 223 (40.0)                                                         | 113 (41.5)                                      | 0.73    |
| Smoking (n (%))                                 |                                                                    |                                                 | 0.035   |
| never                                           | 203 (36.9)                                                         | 124 (45.8)                                      |         |
| current                                         | 56 (10.2)                                                          | 19 ( 7.0)                                       |         |
| former                                          | 291 (52.9)                                                         | 128 (47.2)                                      |         |
| Alcohol consumption (%)                         |                                                                    |                                                 | 0.13    |
| never                                           | 56 (14.7)                                                          | 41 (20.6)                                       |         |

|                                                 |                |                |       |
|-------------------------------------------------|----------------|----------------|-------|
| ≤2 consumptions daily                           | 277 (72.9)     | 140 (70.4)     |       |
| >2 consumptions daily                           | 47 (12.4)      | 18 ( 9.0)      |       |
| <i>Echocardiography</i>                         |                |                |       |
| IVSD at end-diastole (mm)                       | 9.7 (1.7)      | 9.6 (1.8)      | 0.73  |
| LVD at end-diastole (mm)                        | 45 (5)         | 44 (5)         | 0.017 |
| LVPWD at end-diastole (mm)                      | 9.4 (1.5)      | 9.4 (1.6)      | 0.96  |
| Left ventricular ejection fraction (%)          | 67 (8)         | 67 (7)         | 0.81  |
| average E/e' ratio                              | 9.1 (2.7)      | 9.4 (2.7)      | 0.12  |
| Left atrial volume index (ml/m <sup>2</sup> )   | 26 (9)         | 25 (11)        | 0.44  |
| Left ventricular mass index (g/m <sup>2</sup> ) | 76 (19)        | 74 (18)        | 0.25  |
| RWT (%)                                         | 43 (8)         | 43 (9)         | 0.15  |
| Remodeling (%)                                  |                |                | 0.74  |
| Normal geometry                                 | 275 (49.4)     | 124 (45.6)     |       |
| Concentric remodeling                           | 242 (43.4)     | 129 (47.4)     |       |
| Eccentric LVH                                   | 16 ( 2.9)      | 7 ( 2.6)       |       |
| Concentric LVH                                  | 24 ( 4.3)      | 12 ( 4.4)      |       |
| <i>Medication</i>                               |                |                |       |
| β Blocker (n (%))                               | 79 (14.2)      | 39 (14.3)      | 1     |
| Antihypertensive medication (n (%))             | 184 (33.0)     | 90 (33.1)      | 1     |
| Statin (n (%))                                  | 124 (22.3)     | 46 (16.9)      | 0.09  |
| <i>Laboratory</i>                               |                |                |       |
| Total cholesterol (mmol/L)                      | 5 (1)          | 5 (1)          | 0.40  |
| CRP (mg/L)                                      | 2.0 [0.9, 5.5] | 1.3 [0.7, 2.8] | 0.002 |
| Creatinine (μmol/L)                             | 69 (14)        | 70 (14)        | 0.59  |

Abbreviations: BMI, Body Mass Index; CRP, C-reactive protein; IVSD, Interventricular septal diameter; LVD, Left ventricular internal dimension; LVPWD, left ventricular posterior wall diameter; RPP, Rate-pressure product.

Antihypertensive medication are ACE-inhibitor, angiotensin II receptor blocker, thiazide diuretic, spironolacton and calcium channel blocker

The table represents 829 individuals that had no missing data on concentric remodeling

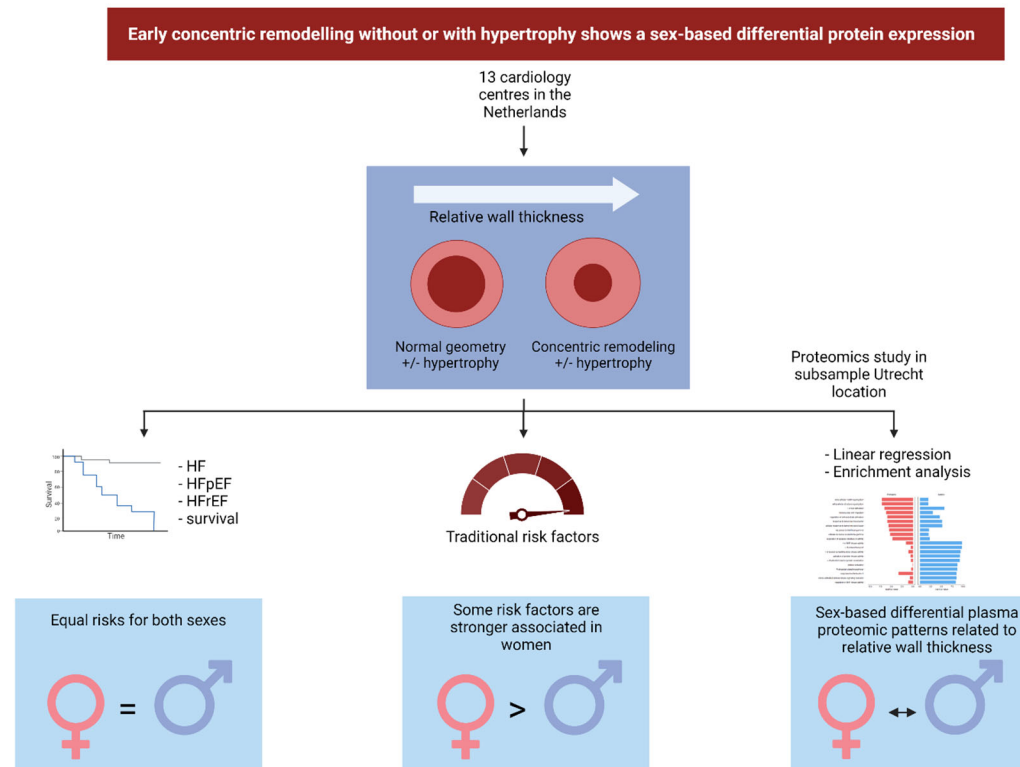

**Figure S1: Central Illustration**

Concentric remodeling confers similar risks between women and men for development of heart failure with preserved ejection fraction (HFpEF) and increases risk of death similarly in both sexes. Contributing risk factors for increased relative wall thickness (RWT) differ statistically significantly in strength of association by sex. Plasma proteomic analysis shows differences in circulating proteins by sex. Several of the top 20 proteins associated with higher relative wall thickness in women are associated with lower relative wall thickness in men. Higher circulating levels of interferon alpha-5 (IFNA5) are associated with higher RWT in women only.

**Figure S2: Flowchart for analyses using data from the Cardiology Centers of the Netherlands**

**Outpatient clinics population.**

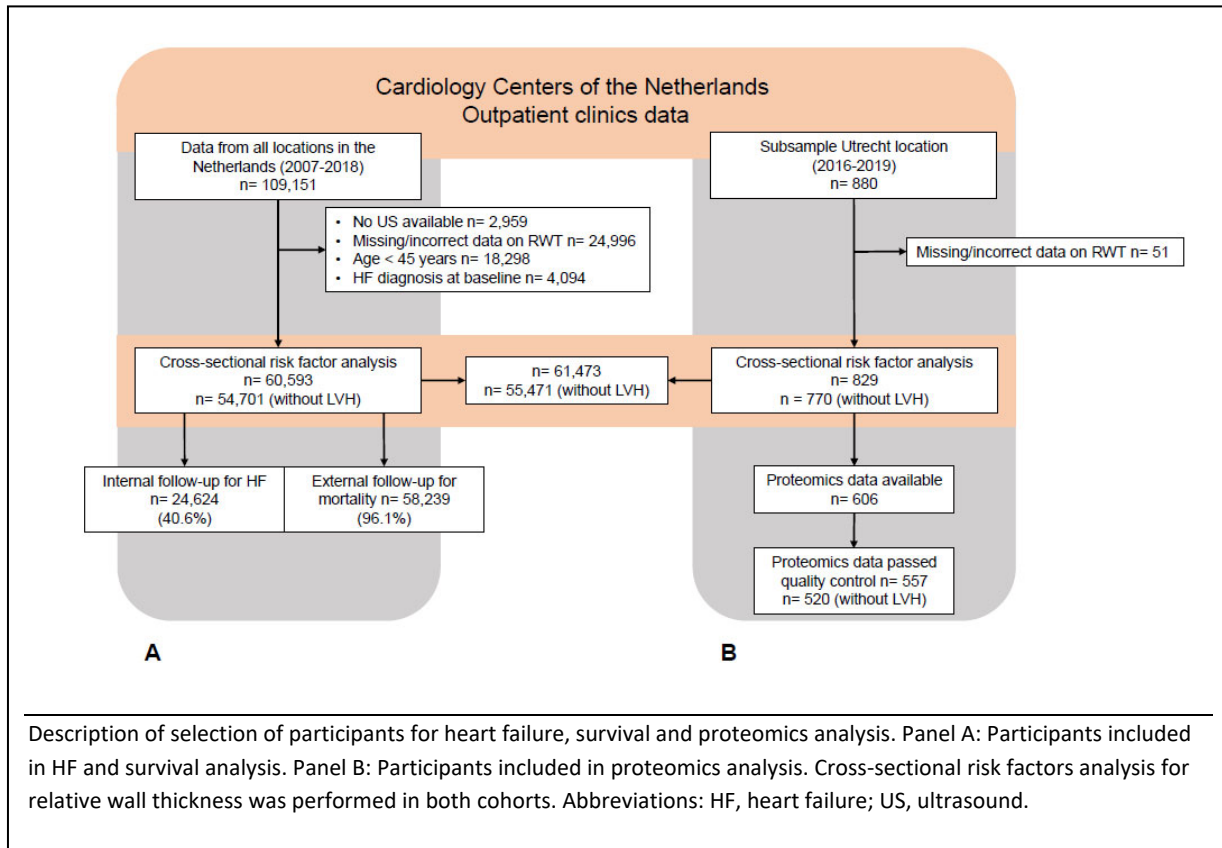



**Figure S3: Flowchart for sample selection and quality control in the proteomics subsample**

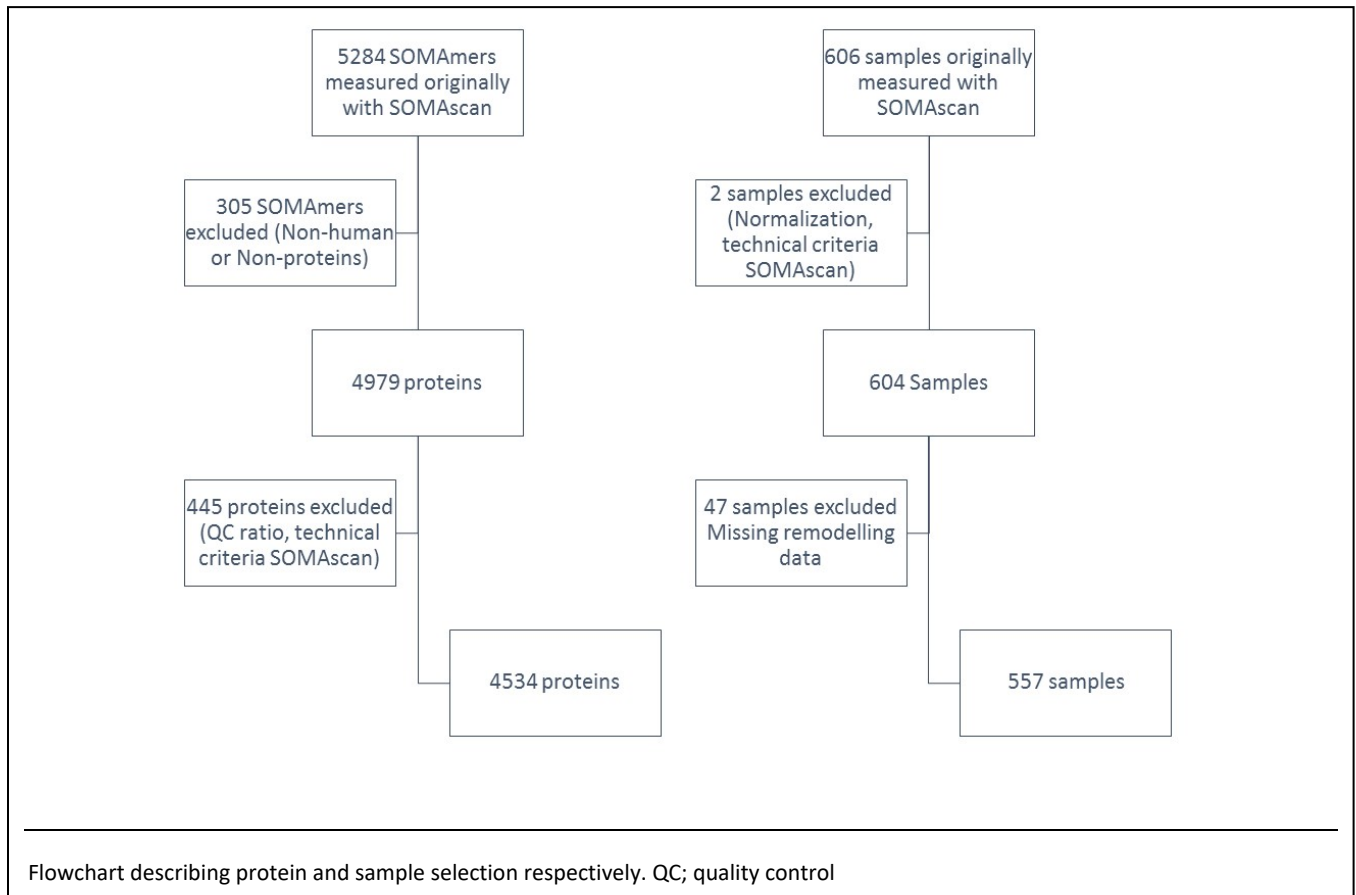

**Figure S4: Volcano plots representing proteins negatively and positively associated with relative wall thickness.**

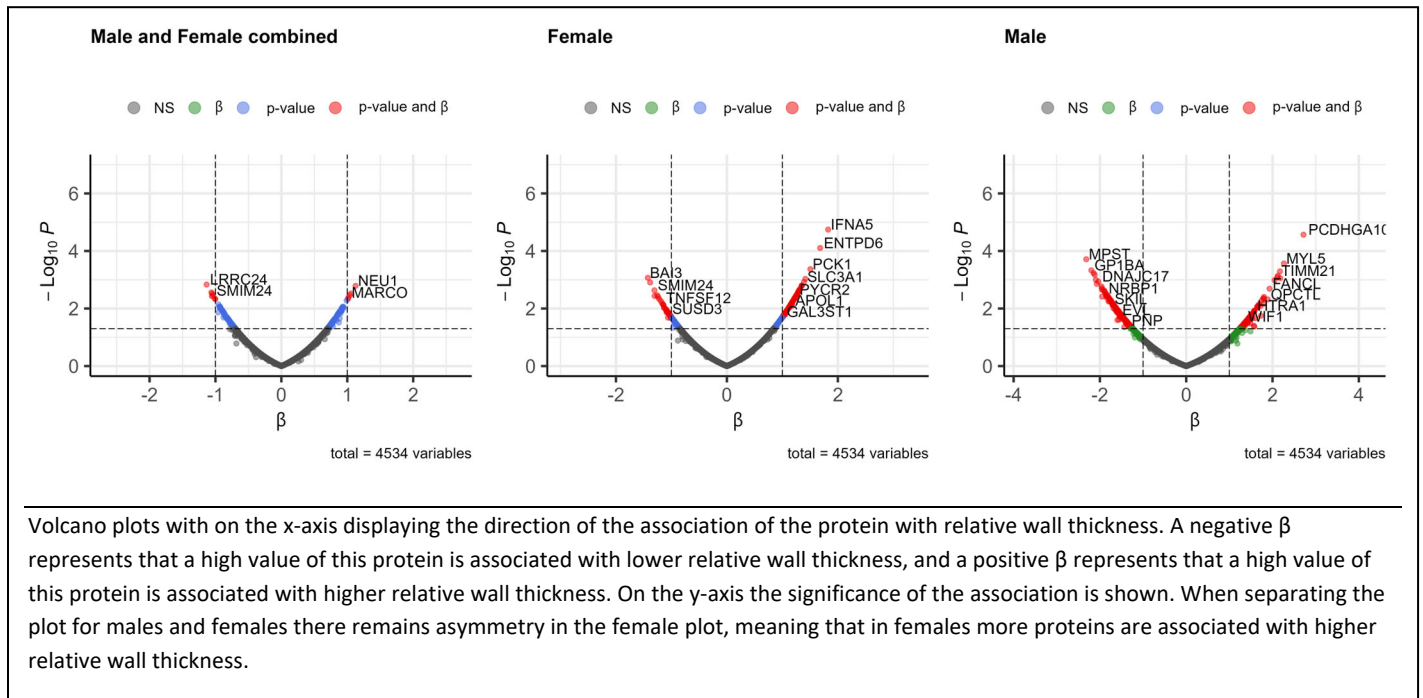

**Figure S5: The association of Interferon  $\alpha$  5 with higher RWT in women (red) and men (blue).**

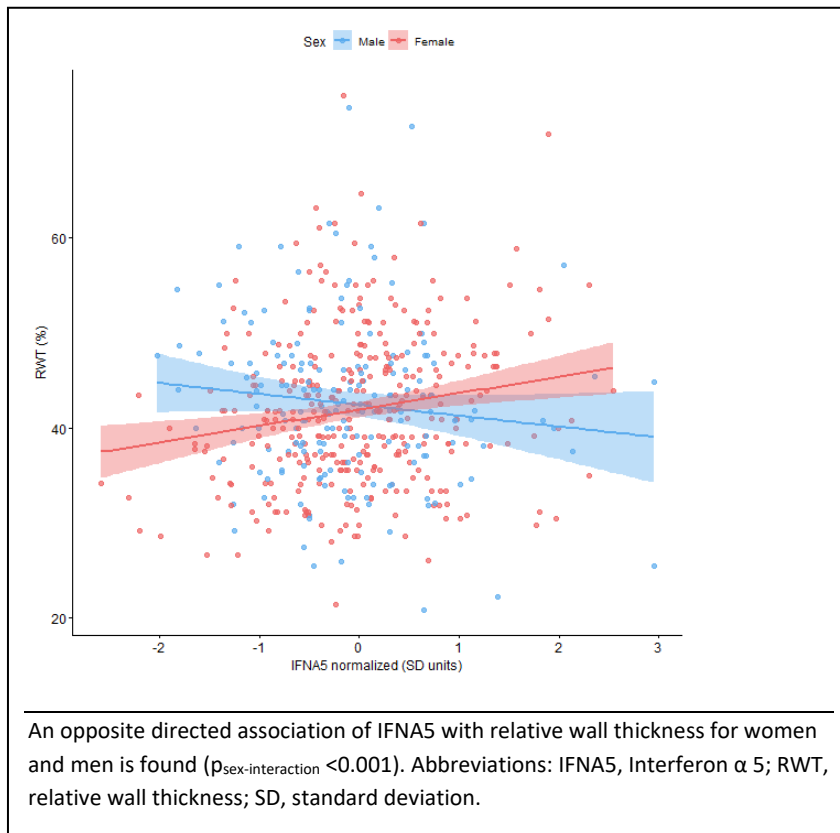

**Figure S6: Pathway analysis of proteins related to relative wall thickness in women and men separately.**

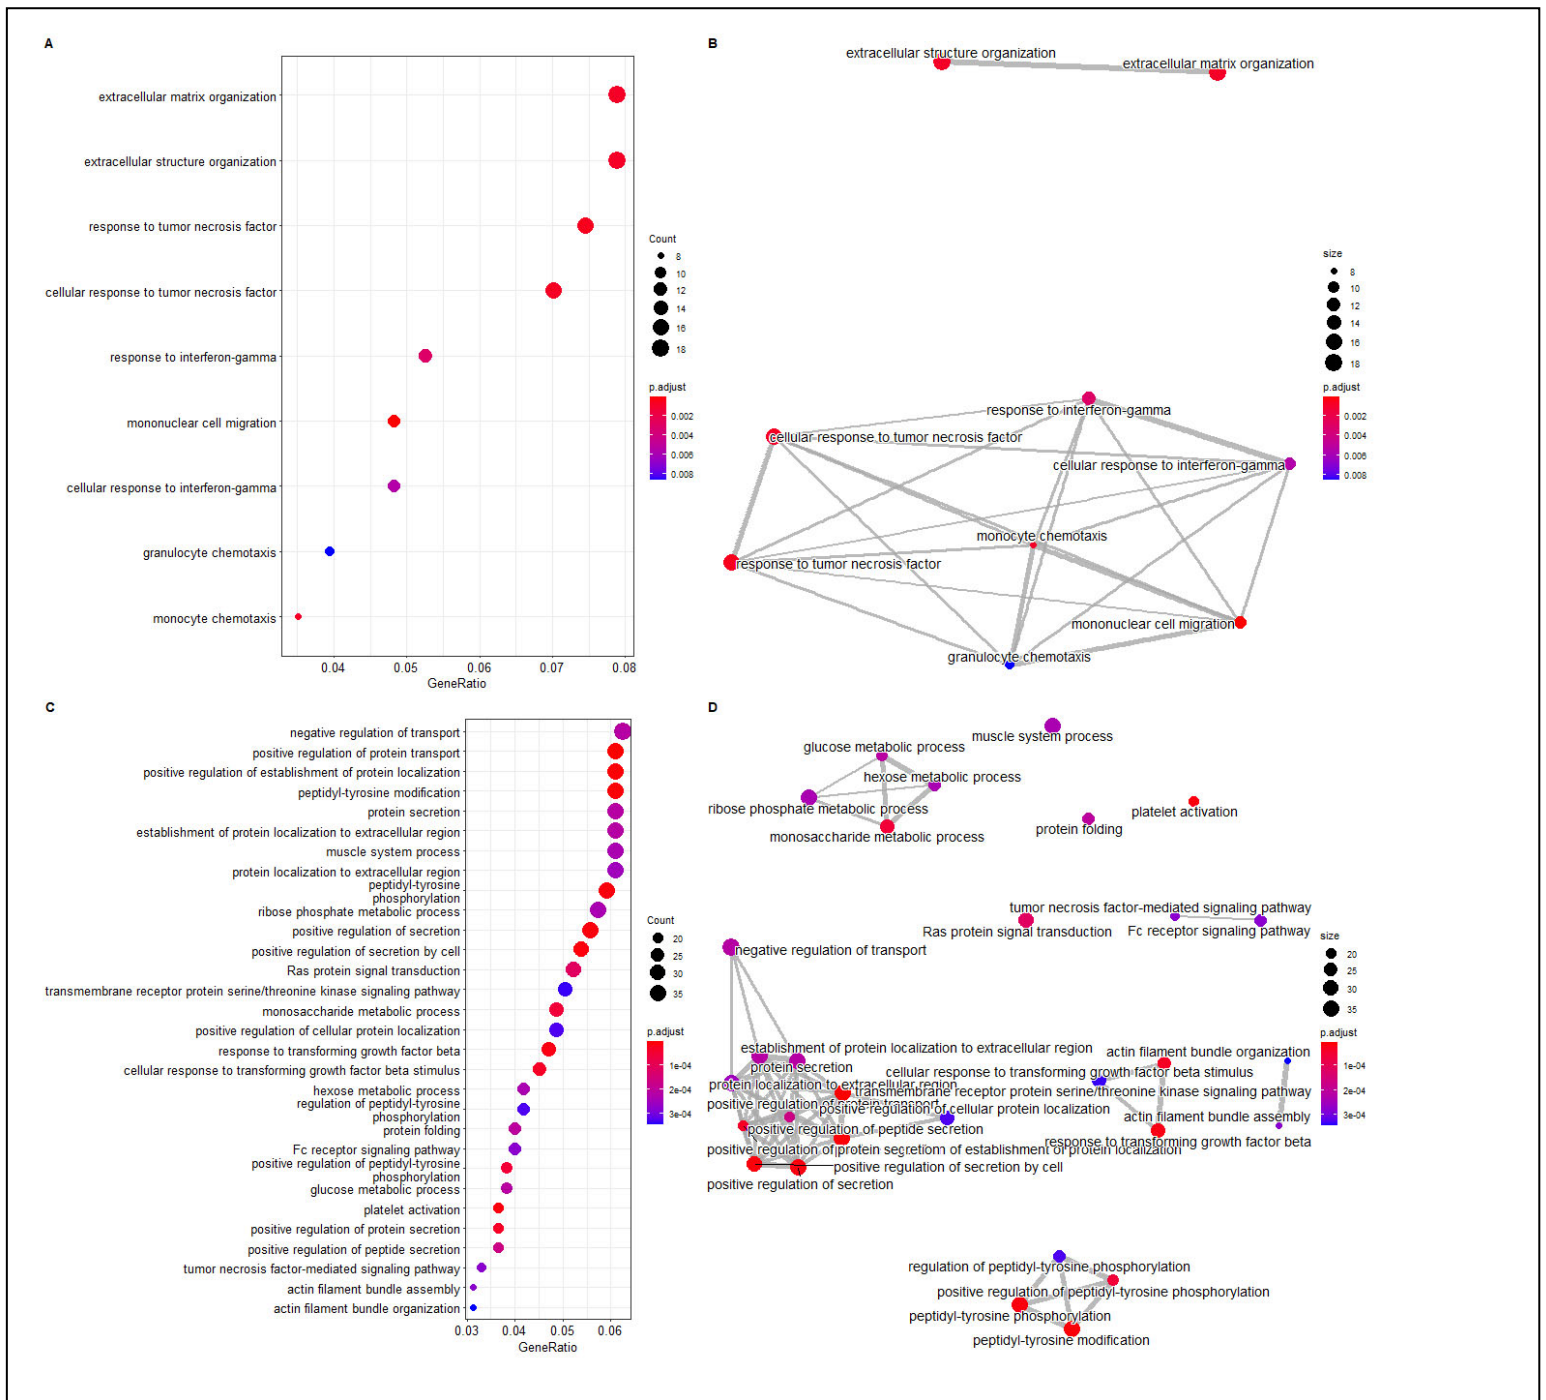

A and B: Pathway analysis in females, C and D: Pathway analysis in males. Pathway analysis was performed for females and males separately, using proteins that associated with RWT. In females there was a high expression of proteins involved in processes related to cell adhesion, extracellular matrix organization and tumor necrosis factor and interferon-gamma activity. Proteins influencing the process of intracellular protein localization and kinase activity were most frequently expressed in males, also MAP kinase and the IL1/Fc-response clusters were only active in males. Abbreviations: MAP, mitogen activated protein; RWT, relative wall thickness.
